# Supplementary material
Source: publisher site journal article supplement (https://www.spandidos-publications.com/5213/downloadSupplementary)
Supplement: Supplementary file 1 [file downloadSupplementary]

## Sheet: Sheet1
Table SI. Primers of RT-qPCR.
Primer	Primer sequence(5'to3')
CDKN2A-F	GATCCAGGTGGGTAGAAGGTC
CDKN2A-R	CCCCTGCAAACTTCGTCCT
PKP1-F	TTTGCCGTCGGACCAAAAGAT
PKP1-R	GAACCTCGATTGGAGTGGCTC
DSG3-F	GCAAAAACGTGAATGGGTGAAA
DSG3-R	TCCAGAGATTCGGTAGGTGATT
ADRB2-F	TTGCTGGCACCCAATAGAAGC
ADRB2-R	CAGACGCTCGAACTTGGCA
ULK1-F	GGCAAGTTCGAGTTCTCCCG
ULK1-R	CGACCTCCAAATCGTGCTTCT
GSDMA-F	GATGTTGGGGACGTACACGAA
GSDMA-R	GGGAGCTTTGCCCTACTCG
AIM2-F	TGGCAAAACGTCTTCAGGAGG
AIM2-R	AGCTTGACTTAGTGGCTTTGG
TLR1-F	TTCAAACGTGAAGCTACAGGG
TLR1-R	CCGAACACATCGCTGACAACT
NLRP1-F	GCAGTGCTAATGCCCTGGAT
NLRP1-R	GAGCTTGGTAGAGGAGTGAGG
NLRP3-F	GATCTTCGCTGCGATCAACAG
NLRP3-R	CGTGCATTATCTGAACCCCAC
GSDMC-F	TCCATGTTGGAACGCATTAGC
GSDMC-R	CAAACTGACGTAATTTGGTGGC
GAPDH-F	TGTTGCCATCAATGACCCCTTC
GAPDH-R	AGCATCGCCCCACTTGATTTTG
B-ACTIN-F	CATGTACGTTGCTATCCAGGC
B-ACTIN-R	CTCCTTAATGTCACGCACGAT
HPV18 E6E7-F	AGCGACTCAGAGGAAGAA
HPV18 E6E7-R	ACACTTACAACACATACACAAC
